1 **31° South: phenotypic flexibility in adaptive thermogenesis among conspecific populations**  
2 **of an arid-endemic bird - from organismal to cellular level**

3  
4 Ângela M. Ribeiro<sup>1§</sup>, Clara Prats<sup>2,3</sup>, Nicholas B. Pattinson<sup>4</sup>, M. Thomas P. Gilbert<sup>1,5</sup>, Ben Smit<sup>4,6</sup>

5  
6 <sup>1</sup> Natural History Museum of Denmark, University of Copenhagen, Copenhagen, Denmark

7 <sup>2</sup> Center for Healthy Aging, and <sup>3</sup> Core Facility for Integrated Microscopy, Department of  
8 Biomedical Sciences, University of Copenhagen, Copenhagen, Denmark

9 <sup>4</sup> Department of Zoology, Nelson Mandela University, Port Elizabeth, South Africa

10 <sup>5</sup> Norwegian University of Science and Technology, University Museum, Trondheim, Norway

11 <sup>6</sup> Current address: Department of Zoology and Entomology, Rhodes University, Grahamstown,  
12 South Africa

13 <sup>§</sup> E-mail: [ribeiro.angela@gmail.com](mailto:ribeiro.angela@gmail.com)

14 Key words: aridity, summit metabolism, body condition, shivering muscles, mitochondria and  
15 lipids

16

17

18 **ABSTRACT**

19 In north-temperate small passerines, overwinter survival is associated with a reversibly increased  
20 maximum cold-induced metabolism ( $M_{\text{sum}}$ ). This strategy may incur increased energy  
21 consumption. Therefore, species inhabiting ecosystems characterized by cold winters and low  
22 productivity (i.e., low available energy) may be precluded from displaying an increase in  
23 maximum metabolic rates. To examine whether  $M_{\text{sum}}$  is a flexible phenotype in such challenging  
24 environments, and ultimately uncover its underpinning mechanisms, we studied an arid-endemic  
25 small bird (Karoo scrub-robin) whose range spans a primary productivity and minimum  
26 temperature gradient. We measured  $M_{\text{sum}}$ , body condition, mass of thermogenic muscles and two  
27 indices of cellular aerobic capacity from populations living in three environmentally different  
28 regions. We found that  $M_{\text{sum}}$  was seasonally flexible, associated with aerobic capacity of limb  
29 muscles, but not increasing with lower temperatures, as predicted. Notwithstanding, the cold limit  
30 (temperature at which birds reached their maximum metabolic capacity) decreased in winter.  
31 These results indicate that birds from arid-zones may respond to cold conditions by altering  
32 thermosensation, rather than spending energy to produce heat in skeletal muscles.

33

## 34 INTRODUCTION

35 Temperature influences animal life at all levels of organization. It affects the efficiency and  
36 functionality of biochemical networks and organism physiological responses (Hochachka and  
37 Somero 2002) in such a pervasive way that extreme heat or cold can be lethal. Therefore, to  
38 withstand thermal changes, vertebrates living in seasonal environments can reversibly alter their  
39 physiological phenotype in a process termed phenotypic flexibility (Angilletta *et al.* 2010)  
40 (McKechnie and Swanson 2010).

41 At cold temperatures, homeothermic-endotherm animals (i.e.: birds and mammals) loose heat  
42 from their warm bodies to the environment. To maintain a high body temperature in cold  
43 conditions, birds principally increase the rate of heat production through shivering (Hothola  
44 2004). While shivering thermogenesis results from cellular processes, namely the activation of  
45 energetic metabolism pathways to burn cellular fuels to power skeletal muscle contraction  
46 (Hothola 2004), it can be quantified at the organism-level as the maximum thermoregulatory  
47 metabolic capacity ( $M_{sum}$ ; (Thompson 2010)). In fact, several studies showed that cold  
48 temperatures lead to increases in  $M_{sum}$  (Vezina *et al.* 2011) (Swanson *et al.* 2014a). One  
49 explanation for this flexibility in maximum metabolic capacity is the cold adaptation hypothesis,  
50 which posits that birds wintering in cold climates should have higher  $M_{sum}$  than those in warmer  
51 climates, and hence high  $M_{sum}$  is critical for overwinter survival in very cold regions (Marsh and  
52 Dawson 1989) (Swanson and Garland 2009). An alternative explanation is offered by the climate  
53 variability hypothesis (Janzen 1967), (Bozinovic and Naya 2014), which posits that broader  
54 climatic fluctuations results in wider flexibility in thermal tolerance as a means to cope with the  
55 fluctuating environmental conditions.

56 Several mechanisms, from whole-organism level down to the biochemical level, have been  
57 proposed to explain the high cold-induced  $M_{sum}$ : i) increase in body condition assessed as body

58 mass (Vézina *et al.* 2006) (Zheng *et al.* 2014); ii) increase in muscle mass, in particular the  
59 pectoralis muscle which is the primary thermogenic organ (Vézina *et al.* 2006) (Swanson *et al.*  
60 2014a); iii) increase in enzymatic activity in oxidative metabolic pathways (Vézina *et al.* 2006)  
61 (Zheng *et al.* 2014) (Liknes and Swanson 2011a); and iv) increase in fat catabolism (Dawson *et*  
62 *al.* 1992) (Thompson 2010). However, evidence for flexibility in  $M_{sum}$ , as well as support for the  
63 above mentioned mechanisms driving up-regulation of  $M_{sum}$ , comes primarily from endotherms  
64 living in north-temperate ecosystems, where summer primary productivity is high (Prince and  
65 Goward 1995), and therefore individuals can afford the large energetic cost of up-regulating  
66 metabolic heat production (Hothola 2004).

67 In ecosystems characterized by low primary productivity and large seasonal temperature  
68 fluctuations, it is not clear how endotherms survive the low winter temperatures if not using  
69 energy saving strategies such as heterothermy. Therefore, to improve our understanding of the  
70 physiological underpinnings of adaptive thermogenesis in such ecosystems, we studied a small  
71 passerine (Karoo scrub-robin, *Cercotrichas coryphaeus*; hereafter designated scrub-robin) living  
72 in the subtropical arid-zone of southwestern Africa. Its range spans over an area of overall low  
73 primary productivity (Prince and Goward 1995) and exhibits a thermal gradient from west to east  
74 (Figure1C). As one transects from the Atlantic coast to inland, winters become increasingly  
75 colder, and primary productivity decreases as rainfall becomes increasingly unpredictable.  
76 Specifically, along the Atlantic coast winters are mild (mean minima: 8°C, record minima >0°C)  
77 and moderately productive from regular fog and predictable winter rainfall; in contrast, in the  
78 continental region minimum temperatures reach sub-zero (mean minima: -3°C, record minima <-  
79 10°C) and primary productivity is very low year-round. Given these environmental features, the  
80 scrub-robin renders an ideal system for testing whether sub-tropical birds fine-tune phenotypes  
81 associated with adaptive thermogenesis in response to local environmental conditions. We  
82 hypothesize that birds from populations experiencing sub-zero winter temperatures would

83 exhibit more pronounced increase of  $M_{\text{sum}}$  than populations from milder conditions, a pattern  
84 that can be driven by hypertrophy of pectoral (Swanson et al. 2014b) and lower limb (Isaac *et*  
85 *al.* 2014) muscles. However, low food abundance in such low productive ecosystems would  
86 hinder muscle build up. Thus, an alternative mechanism may be in place. Given the evidence  
87 showing that quantity and morphology of mitochondria (cellular powerhouses) change in  
88 response to bioenergetic cues (Putti *et al.* 2015) (Nasrallah and Horvath 2014), and that lipid  
89 droplets play an essential role in energy provisioning during exercise (Bosma 2016) and  
90 shivering in birds (Vaillancourt *et al.* 2005), we further predicted that the high metabolic  
91 capacity at organismal level would stem from increased cellular aerobic metabolism.  
92 Specifically, we anticipated that increased density of mitochondria and lipid droplets would be  
93 positively associated with  $M_{\text{sum}}$ . To test our hypothesis we developed an integrative approach at  
94 several levels of organization (Figure1).

95

## 96 **METHODOLOGY**

### 97 ***Study sites, sampling and ethical clearance***

98 We selected study sites that represent three main regions along the climatic and primary  
99 productivity gradient in the scrub-robin range (Figure 1C): *Coastal*, *Central* and *Inland*. We  
100 captured 85 adult birds in three regions and two seasons (summer: December 2015; winter: July  
101 2016):  $n_{\text{coastal}} = 32$  ( $n_{\text{summer}} = 18$ ;  $n_{\text{winter}} = 14$ ),  $n_{\text{central}} = 27$  ( $n_{\text{summer}} = 14$ ;  $n_{\text{winter}} = 13$ ) and  $n_{\text{inland}} = 26$   
102 ( $n_{\text{summer}} = 10$ ,  $n_{\text{winter}} = 16$ ). Birds were captured using spring traps baited with mealworms  
103 (*Tenebrio molitor*). We kept them in individual cages in a quiet room with *ad libitum* access to  
104 food for no more than 24h, when the metabolic experiments took place. We released the birds at  
105 the point of capture, except those sacrificed (details below). Each sampling location was  
106 georeferenced and the GPS coordinates were the used to extract mean minimum temperature  
107 ( $T_{\text{min}}$ ) and Normalised Difference Vegetation Index (NDVI), a surrogate for primary productivity,

108 for the months of data collection.  $T_{\min}$  was extracted from two sources: i) WorldClim V2  
109 database (<http://worldclim.org/version2>; (Fick and Hijmans 2017)) which is averaged from 1970-  
110 2000 interpolated at 2.5min resolution (~5km) and ii) South African Weather Service for three  
111 weather stations closest to our study and contemporary to our experiments. NDVI at 250m  
112 resolution from USGS-LandDAAC-MODIS dataset hosted by United States Geological Survey  
113 ([https://lpdaac.usgs.gov/dataset\\_discovery/modis](https://lpdaac.usgs.gov/dataset_discovery/modis)).

114 Permits to capture, handle and sacrifice birds were issued by the Northern Cape Department of  
115 Environmental Affairs (ODB 2665 & 2666/2015; Northern Cape Province) and CapeNature  
116 (0056-AAA008-00051; Western Cape Province) in South Africa. The Animal Ethical Committee  
117 at Nelson Mandela Metropolitan University (South Africa) approved all experiments (A15-SCI-  
118 ZOO-005).

119

## 120 ***Body Condition: $BM_{scaled}$ , fat scores and mass of thermogenic muscles***

121 The capacity to withstand environmental challenges (known as body condition; (Hill 2011)) was  
122 assessed using three indices: i) body mass scaled by size ( $M_{b-scaled}$ ), ii) fat scores and iii)  
123 thermogenic muscles mass.

124 To quantify  $M_{b-scaled}$ , which reflects the relative size of energy reserves such as protein and fat,  
125 we used the standardization technique proposed by (Peig and Green 2009): standard major axis  
126 regression between body mass (electronic scale,  $d = 0.01$  g) and the linear body measurement  
127 tarsus-length (calliper,  $d = 0.01$  mm). Thus,  $M_{b-scaled} = M_i \times [L_0/L_i]^{b_{SMA}}$ , where  $M_i$  and  $L_i$  are the  
128 body mass and tarsus-length of individual  $i$ , respectively;  $L_0$  is the tarsus-length arithmetic mean  
129 for the study populations to which index is standardized;  $b_{SMA}$  is the scaling exponent estimated  
130 by the standardized major axis regression of mass-length.

131 We checked fat accumulation at the furcular depression and abdomen in all 85 adult birds, and  
132 quantified it using a scale that ranges from zero (no fat) to eight (flight muscles not visible with

133 fat covering the entire abdomen); (Kaiser 1993). Fat scores were verified in the birds we  
134 sacrificed to collect thermogenic muscles, as reported below.

135 We sacrificed 25 of the 85 birds: Coastal (n=10; 5 in each season), Central (n= 10; 5 in each  
136 season) and Inland (n= 6; summer: 1, winter: 5) by thoracic compression in the early morning  
137 after the rest-phase of birds. We excised the pectoralis and gastrocnemius muscles from the right-  
138 side body plane and measured their wet mass (electronic scale, d = 0.001 g). To estimate the total  
139 mass of pectoralis (Pectoralis<sub>mass</sub>) and gastrocnemius (Limb<sub>mass</sub>) we doubled the mass of the  
140 single muscles.

141

#### 142 ***Aerobic capacity: immunostaining and confocal imaging of mitochondria and lipid droplets***

143 Because mitochondria density and morphology, and lipid droplets have been shown to play an  
144 essential role in energy provisioning during exercise, we measured the density of both intra-  
145 cellular organelles in the pectoralis and gastrocnemius muscles. Immediately after weighing the  
146 muscles, we fixed them by immersion into 2% paraformaldehyde as previously described (Dahl  
147 *et al.* 2014). In the laboratory, fiber bundles were teased apart under a stereomicroscope and  
148 stored until further processing. We prepare only muscles for birds at the extremes of the  
149 environmental gradient: *Coastal* (n = 10) and *Inland* (n = 6). Mitochondria were labelled by  
150 immunofluorescence using an antibody targeting Cytochrome C Oxidase and lipid droplets were  
151 stained using an antibody targeting Perilipin2. Briefly, single muscle fibers were permeabilized,  
152 incubated with primary anti-bodies, washed, subsequently incubated with secondary anti-bodies,  
153 and finally mounted in a glass slide. We used a Zeiss LSM710 microscope (Carl Zeiss, Germany)  
154 to image 8 - 10 fibers per individual muscle, and for each fiber we collected 16-22 z-planes.  
155 Orthogonal maximal projections were obtained for the 318 fibers, which were then used for  
156 image analysis.

157 To estimate the area occupied by mitochondria and lipid droplets, we developed a pipeline (step-

158 by-step in Table S1, Supplementary Information) in CellProfiler Analyst (Jones *et al.* 2008). Our  
159 pipeline identified nuclei area, cytoplasm area, mitochondria area and lipid droplets area of each  
160 fiber. With these measures we estimated the fraction of the whole fiber occupied by mitochondria  
161 or lipid droplets as follows: Mitochondria fractional area (FAMito) = Mitochondria area  
162 / [cytoplasm area – nuclei area], Lipid droplets fractional area (FALipids) = Lipid droplets area  
163 / [cytoplasm area – nuclei area]. Transversal mitochondrial connections were counted manually  
164 from projected z-stacks. All processed images were manually curated by inspecting the overlay  
165 of the objects against the original image, and troubleshoot individually as needed. For full details  
166 on the immunostaining and image acquisition protocols see Supplementary Information.

167

### 168 ***Cold-induced metabolism, body temperature and conductance***

169 Birds showing any sign of body, wing and tail moult as well as those too agitated or not feeding  
170 enough (showing mass loss exceeding 5%) were excluded from cold-exposure experiments (n =  
171 18). The remaining 67 birds were fitted with temperature-sensing passive integrated transponders  
172 (PIT-tag; BioThermo13, Biomark Inc., USA) to enable monitoring of body temperature ( $T_b$ )  
173 throughout the experiments. Each PIT-tag was injected into the bird's abdominal cavity as  
174 described in (Oswald *et al.* 2018).

175 After PIT-tag implantation, the bird rested in the cage for at least 30 min before cold-exposure  
176 experiments. Cold exposure experiments took place within 24h of capture at each field site,  
177 during the active phase of the birds (9am-4pm) after food was withheld for 2h.

178 To quantify metabolic rates under cold conditions, we used an open-flow respirometry system  
179 (FoxBox-C Field Gas Analysis System, Sable Systems, USA) to measure bird's  $O_2$  consumption  
180 and  $CO_2$  production while exposed to a HelOx atmosphere (79% Helium + 21% Oxygen). HelOx  
181 was used because it allows maximum rates of heat loss at higher temperatures than normal air,  
182 and therefore prevents frostbite (Holloway and Geiser 2015). Data were recorded using



183 EXPEDATA software (Sable Systems). Specifically, HelOx was pushed through a respirometry  
184 chamber (22 cm x 15 cm x 12 cm) holding the bird at flow rates of  $\sim 1.5 \text{ L min}^{-1}$  using a mass  
185 flow controller (Omega, USA). The excurrent air from the respirometry chamber then passed  
186 through a multiplexer (Sable Systems), into an open manifold system, and was subsequently  
187 pulled through the gas analysers by the FoxBox system at a flow rate of around  $0.5 \text{ L min}^{-1}$ .

188 The experiment involved placing the respirometry chamber housing the bird into a 40 L  
189 fridge/freezer (ARB, Australia) serving as an environmental chamber (Noakes et al. 2017). For  
190 the first 10-20 minutes of the trial, atmospheric air was pushed through the chamber (flow-rate of  
191  $\sim 1.5 \text{ L min}^{-1}$ ) to allow the bird to calm down. Trials started at air temperature ranging from 15 - 20  
192 °C (higher in summer than in winter) by switching the air stream to HelOx. The birds were then  
193 exposed to a sliding cold exposure protocol, by reducing air temperature by 3 °C every 10  
194 minutes. Ambient temperature was recorded manually every 2 min using a Cu-Cn thermocouple  
195 (IT-18, Physitemp Instruments, USA) and temperature recorder (RDXL 12SD, Omega). Body  
196 temperature of birds was recorded at 1 sec intervals by placing the PIT-tag reader inside the  
197 environmental chamber. Trials ended when i)  $\dot{V}_{\text{CO}_2}$  started to decline indicating peak thermogenic  
198 metabolism had been reached, and ii)  $T_b < 34 \text{ °C}$ . Unlike previously published studies on  
199 passerines undergoing cold exposure that were terminated when birds reached  $T_b < 37 \text{ °C}$   
200 (Swanson et al. 1996) we found that many scrub-robins showed a decline in  $T_b$  well below  $37 \text{ °C}$ ,  
201 while still increasing resting metabolism and hence the reason for establishing the  $T_b < 34 \text{ °C}$   
202 threshold.

203 Cold exposure experiments generally took less than 1 h and peak metabolic rates were typically  
204 reached within 20 minutes of HelOx. At the end of each experiment the bird was placed back in  
205 the holding cage, in a warm place, with food and water available ad libitum. For each bird, we  
206 recorded the time, air temperature and  $T_b$  at which  $M_{\text{sum}}$  was reached. The air temperature at

207 which  $M_{\text{sum}}$  was reached is defined here as the cold limit ( $T_{\text{CL}}$ ). To calculate  $M_{\text{sum}}$ , we obtained  
208 the highest 5 min mean  $\dot{V}_{\text{CO}_2}$  during cold exposure. We chose  $\dot{V}_{\text{CO}_2}$  over  $\text{O}_2$  consumption, as  
209 our field set up did not allow for systematic drift correction in oxygen values in all individuals. In  
210 addition, we estimated thermal conductance by calculating the rate of heat loss when birds reach  
211 their  $M_{\text{sum}}$  using the following equation  $C = M_{\text{sum}}/(T_b - T_a)$ , where  $T_b$  and  $T_a$  represent body  
212 temperature and  $\text{He/O}_x$  temperature measured within five minutes of the birds reaching  $M_{\text{sum}}$ ,  
213 respectively.

214

### 215 ***Statistics***

216 We extracted NDVI and  $T_{\text{min}}$  values for our sampling sites using the R *Raster* package (Hijmans  
217 2017). For all variables, we tested for normality and homogeneity of variance using Shapiro–  
218 Wilk’s and Levene’s test, respectively. If heteroscedasticity was detected, the response variable  
219 was log-transformed. We used an analysis of variance to test for sexual dimorphism. In the event  
220 that sex was not significant, we removed the variable and proceeded with pooled sexes. We tested  
221 for the role of environmental features such as  $T_{\text{min}}$  and NDVI on body condition, mass of  
222 thermogenic muscles (mass of pectoralis and gastrocnemius) and cellular aerobic capacity  
223 (density of mitochondria and lipid droplets), cold limit ( $T_{\text{CL}}$ ) and thermal conductance using  
224 generalised linear models (GLMs). We opted to use  $T_{\text{min}}$  experienced during each study period as  
225 a linear predictor instead of “season” as a categorical predictor as we believe that variation  
226 amongst study site in the former metric would explain physiological responses better.

227 Additionally, we examined the influence of  $T_{\text{min}}$  and NDVI, body condition, size of thermogenic  
228 muscles and cellular aerobic capacity on  $M_{\text{sum}}$  using GLMs.

229 All statistical analyses were performed in R v3.3.2 (R Development Core Team) and plots  
230 produced with *ggplot2* package (Wickham 2016). We accepted  $p \leq 0.05$  as a significant

231 difference for all statistical tests.

232

## 233 RESULTS

234 Regardless of the source of  $T_{\min}$  (WorldClim or SAWS) the results were consistent; therefore for  
235 the sake of brevity, in the main text we present the results for  $T_{\min}$  obtained from WorldClim and  
236 report results with  $T_{\min}$  SAWS in Supplementary Information.

237

### 238 ***Body condition: $BM_{scaled}$ , fat depots and muscle mass***

239 We found that minimum temperature ( $T_{\min}$ ), but not primary productivity (NDVI), was a  
240 significant predictor of size corrected body mass ( $M_{b-scaled}$ ). Birds significantly increased body  
241 condition as  $T_{\min}$  decreased (GLM;  $t_{T_{\min}} = -3.666$ ,  $p < 0.01$ ); FIGURE 2A-B). At the regional  
242 level, the decrease of  $T_{\min}$  and NDVI lead to a significant increase of  $M_{b-scaled}$  for birds living in  
243 the *Inland* (GLM,  $t_{T_{\min}} = 2.254$   $p=0.03$ ;  $t_{NDVI} = 3.229$ ,  $p < 0.01$ ) and *Coastal* (GLM,  $t_{T_{\min}} = -2.763$ ,  
244  $p = 0.01$ ;  $t_{NDVI} = -2.506$ ,  $p = 0.02$ ) regions, although no change was observed for *Central* region  
245 birds.

246 Minimum temperature, but not NDVI, was significantly associated with fat deposits (GLM,  $t_{T_{\min}}$   
247  $= -14.795$ ,  $p < 0.01$ ; FIGURE 2C-D). The amount of visible fat significantly increased as  $T_{\min}$   
248 decreased in *Coastal* (GLM,  $t_{T_{\min}} = -4.295$ ,  $p < 0.01$ ), *Central* (GLM,  $t_{T_{\min}} = -6.245$ ,  $p < 0.01$ ) and  
249 *Inland* (GLM,  $t_{T_{\min}} = -2.421$ ,  $p = 0.02$ ) regions. For all populations fat depots were absent to very  
250 low during the summer (Fat scores = 0 - 0.25) compared to winter values ranging from 0.5 to 1.5  
251 (1.5 = furcular depression almost completely covered with fat, plus small stripes of fat in  
252 abdomen).

253 Overall, the pectoral muscles ( $n = 15$ , mean  $\pm$  SE =  $1.114 \pm 0.034g \times 2 = 2.228 \pm 0.068 g$ )  
254 accounted for 12.3% of scrub-robin body mass ( $n = 15$ , mean  $\pm$  SE:  $18.8g \pm 1.382 g$ ), while the  
255 gastrocnemius ( $n = 15$ , mean  $\pm$  SE:  $0.089 \pm 0.002 g \times 2 = 0.178 \pm 0.004 g$ ) represented 0.94% of

256 birds' body mass. There was no association of Pectoral<sub>mass</sub> or Limb<sub>mass</sub> with T<sub>min</sub> or NDVI:  
257 GLM<sub>pectoral</sub>, t<sub>Tmin</sub> = -0.832, t<sub>NDVI</sub> = -1.116, p > 0.10; GLM<sub>limb</sub>, t<sub>Tmin</sub> = -0.832, t<sub>NDVI</sub> = -1.116, p >  
258 0.10.

259

### 260 *Aerobic capacity: Mitochondria and lipid droplets density*

261 Confocal micrographs of the pectoralis muscle revealed densely packed round mitochondria  
262 (Figure3A). Mitochondria fractional area (FAMito) ranged from 0.615 (± 0.084) in pectoral  
263 fibers, to 0.416 (± 0.092) in limb (Table S2, Supplementary Information). FAMito<sub>pectoral</sub> was  
264 approx. 20% significantly larger than FAMito<sub>limb</sub> (F = 38.054, p < 0.01).

265 FAMito<sub>pectoral</sub> was not associated with T<sub>min</sub> (GLM, t = 2.071, p = 0.06) or NDVI (GLM, t = -  
266 0.287, p > 0.10). FAMito<sub>limb</sub> was not associated with NDVI (GLM, t = 1.803, p = 0.096) but  
267 associated with T<sub>min</sub> (GLM, t = 2.994, p = 0.01): mitochondria densities increased with T<sub>min</sub>.

268 Transversal connections between intermyofibrillar mitochondrial networks were exclusively  
269 observed in limb fibers (Figure3A). In the *inland* population, 80% of the individuals showed  
270 connections, while in the *coastal* population connections were only present in 40% of the birds.

271 The mean fractional area occupied by lipid droplets (FALipids) ranged from 0.035 in pectoral  
272 fibers to 0.040 in limb (Table S2, Supplementary Information), with no significant difference  
273 between them (F = 0.195, p = 0.66). FALipid<sub>limb</sub> was significantly associated with T<sub>min</sub>, but not  
274 with NDVI (GLM, t<sub>Tmin</sub> = 1.794, p = 0.04; t<sub>NDVI</sub> = -0.617 p > 0.1), showing an increase at higher  
275 temperatures (Figure3B). FALipid<sub>pectoral</sub> did not change with T<sub>min</sub> or NDVI (GLM, t<sub>Tmin</sub> = 1.082,  
276 t<sub>NDVI</sub> = 0.486, p > 0.1).

277

278 *M<sub>sum</sub> association with environmental features, body condition, thermogenic organs, and*  
279 *aerobic capacity*

280 We observed no sexual dimorphism in maximum thermoregulatory metabolic capacity ( $M_{\text{sum}}$ ;  
281 ANOVA,  $F = 0.202$ ,  $p > 0.1$ ). Maximum thermogenic capacity ( $M_{\text{sum}}$ ) ranged from 1.373 to 3.309  
282 mL  $\text{CO}_2/\text{min}$ , with mean =  $2.341 \text{ mL CO}_2/\text{min} \pm 0.384 \text{ SD}$ .  $M_{\text{sum}}$  was significantly positively  
283 related with  $T_{\text{min}}$  (GLM,  $t = 2.764$ ,  $p < 0.01$ ) and  $M_{\text{b-scaled}}$  (GLM,  $t = 2.703$ ,  $p < 0.01$ ) but not with  
284 NDVI (GLM,  $t = 1.044$ ,  $p > 0.1$ ).

285 When restricting the analysis to regional-level, we found that  $M_{\text{sum}}$  increased alongside with  
286 increasing  $T_{\text{min}}$  (i.e. summer) in *Coastal* (GLM,  $t = 2.903$ ,  $p = 0.01$ ) and *Central* (GLM,  $t =$   
287  $2.577$ ,  $p = 0.02$ ) populations alongside increasing  $T_{\text{min}}$  (i.e. summer), whereas birds from *Inland*  
288 showed no significant changes (GLM,  $t = 1.446$ ,  $p = 0.163$ ; Figure 2E).

289 At maximum thermogenic capacity, scrub-robins defended similar body temperatures regardless  
290 of local  $T_{\text{min}}$  (GLM;  $t = 1.510$ ,  $p > 0.1$ ). Nevertheless, the temperature that triggered the  
291 maximum heat production - cold limit ( $T_{\text{cL}}$ ) - decreased at lower  $T_{\text{min}}$  (GLM,  $t = 7.661$ ,  $p < 0.01$ ;  
292 Figure 2F). This association that was significant for the three regions: *Coastal* (GLM,  $t = 2.523$ ,  $p$   
293  $= 0.019$ ), *Central* (GLM,  $t = 2.634$ ,  $p = 0.017$ ) and *Inland* (GLM,  $t = 5.034$ ,  $p < 0.01$ ).

294 Overall, the rate of metabolic heat loss was positively associated with increasing  $T_{\text{min}}$  (GLM;  $t =$   
295  $4.858$ ,  $p < 0.01$ ) but not with  $M_{\text{b-scaled}}$  (GLM;  $t = 1.471$ ,  $p > 0.1$ ). Within-region, thermal  
296 conductance significantly increased with increasing  $T_{\text{min}}$  in *Coastal* and *Central* populations  
297 (GLM;  $t_{\text{Coastal}} = 3.966$ ,  $p < 0.01$ ;  $t_{\text{Central}} = 4.976$ ,  $p < 0.01$ ), while no association with  $T_{\text{min}}$  was  
298 found for *Inland* birds (GLM;  $t_{\text{Inland}} = 1.962$ ,  $p = 0.064$ ).

299 We found  $M_{\text{sum}}$  to be associated with increasing  $T_{\text{min}}$  but not NDVI (Table 1, model A). At the  
300 whole-organism level,  $M_{\text{sum}}$  significantly increased with  $M_{\text{b-scaled}}$  (Table 1, model B), and  
301 decreased with fat depots (Table 1, model B). At muscular level,  $M_{\text{sum}}$  was not affected by mass  
302 of thermogenic muscles (Table 1, model C). At the cellular level, none of the proxies of aerobic  
303 capacity was associated with  $M_{\text{sum}}$  (Table 1, model D).

304

## 305 **DISCUSSION**

306 Cold temperatures have long been recognized as an inescapable physiological stressor for small-  
307 bodied endotherms such as birds (Tattersall *et al.* 2012). While small birds from north-temperate  
308 habitats deal with this challenge through flexibility in thermoregulatory physiological traits (e.g.:  
309 (Dawson and Olson 2003), (Vézina *et al.* 2006)), there is a paucity of information on whether  
310 sub-tropical species use similar mechanisms (Smit and McKechnie 2010), as well as whether  
311 intra-specific variation allows populations to acclimatize to local conditions (van de Ven *et al.*  
312 2013).

313 By combining evidence from different levels of organization from populations of a small  
314 passerine living in different temperature and primary productivity conditions we found that: i)  
315 body condition increased with lower minimum temperatures ( $T_{\min}$ ); ii) thermogenic mass  
316 remained unchanged regardless of  $T_{\min}$  or variation in primary productivity (NDVI); iii) in  
317 pectoralis muscle, density of mitochondria and lipid droplets was maintained seasonally; iv) in  
318 limb muscles, both the mitochondrial and lipid droplet densities decreased with lower  $T_{\min}$ ; v) at  
319 maximum thermogenic capacity, the environmental temperature that triggered maximum heat  
320 production - cold limit ( $T_{CL}$ ) - decreased at lower  $T_{\min}$  for the three populations; nevertheless, the  
321 rate of heat loss remained unchanged for birds experiencing the wider thermal fluctuations -  
322 *Inland* birds; vi) maximum thermogenic capacity ( $M_{\text{sum}}$ ) showed no seasonal flexibility in the  
323 population living in the coldest and least productive area (*Inland*:  $T_{\min} < 0$  °C and NDVI = 0.30),  
324 and surprisingly increased, in summer, in populations experiencing milder conditions (*Coastal*  
325 and *Central* regions) and, vii)  $M_{\text{sum}}$  was not associated with aerobic capacity in the small limb  
326 muscles or in large thermogenic pectoralis.

327 Overall, these results indicate that at least this arid-zone sub-tropical small bird species does not  
328 conform to the cold-adaptation hypothesis or to the climate variability hypothesis. Specifically,  
329 the birds that concomitantly experience the coldest conditions and the widest thermal fluctuations

330 showed the least degree of phenotypic flexibility in all eco-physiological traits quantified. Thus,  
331 our findings suggest that high  $M_{\text{sum}}$  and reduced thermal conductance is not the critical  
332 mechanism for successful overwintering in the cold winters of the arid sub-tropical habitats.

333

### 334 ***Thermogenesis in sub-tropical arid-zones***

335 Although  $M_{\text{sum}}$  revealed to be seasonally and regionally flexible, the observed patterns contrast  
336 with our predictions. Firstly,  $M_{\text{sum}}$  flexibility was only found in populations living in the milder  
337 portion of the scrub-robin range (*Coastal* and *Central*) and not in the population exposed to sub-  
338 zero  $T_{\text{min}}$  in winter (*Inland*). And secondly, the trend was to increase thermogenic capacity in  
339 summer, the period where  $M_{\text{sum}}$  was expected to be at an annual minimum (Swanson and Garland  
340 2009) due to annual highest  $T_{\text{min}}$ . Our estimates of  $M_{\text{sum}}$  (assuming an respiratory exchange ratio  
341 of 0.71) are, on average, 75% of the values predicted by Swanson and Bozinovic (2011) for a 19  
342 g oscines passerine, suggesting that  $M_{\text{sum}}$  is not directly linked to cold tolerance in this arid-zone  
343 passerine.

344 Our findings contrast with cold-induced increased of  $M_{\text{sum}}$  in north-temperate passerines (e.g.:  
345 American Goldfinch *Spinus tristis* (Swanson et al. 2014b), House sparrow *Passer domesticus*  
346 (Liknes and Swanson 2011a) and are only comparable to results reported for two other southern  
347 African birds living in similar latitudes in South Africa: the red-bishop (*Euplectes orix*; (van de  
348 Ven et al. 2013) and the white-browed sparrow-weaver (*Plocepasser mahali*; (Noakes et al.  
349 2017). Both studies found population-specific patterns in  $M_{\text{sum}}$  flexibility, with some populations  
350 increasing  $M_{\text{sum}}$  in winter (in colder sites), while others showed no seasonal change.

351 Although the lack of increased  $M_{\text{sum}}$  in scrub-robins at colder temperatures was unexpected, it  
352 was consistent with the unchanged mass of the major thermogenic muscles (pectoralis and  
353 gastrocnemius). In contrast to northern-temperate Passeriformes that increase the mass of  
354 metabolically active organs (Liknes and Swanson 2011b), we did not observe a cold-induced

355 hypertrophy of pectoralis or gastrocnemius in scrub-robins. Therefore, we postulate that the low  
356 productivity in the arid-zone of southern Africa compared to the northern-temperate regions may  
357 preclude the growth of the energetically expensive thermogenic muscles. Equally unforeseen was  
358 the increased  $M_{\text{sum}}$  in summer in *Coastal* and *Central* populations. We contend the summer  
359 increase in  $M_{\text{sum}}$  is not related to reproduction as these populations breed late during the Austral  
360 winter/spring following predictable rainfall events. Further, the elevated  $M_{\text{sum}}$  was not related to  
361 moulting as we eliminated individuals showing clear signs of moult from analyses. The fact that  
362 elevated  $M_{\text{sum}}$  during summer in *Coastal* populations coincided with elevated heat loss rates,  
363 suggest it may be explained by the strong summer winds at air temperatures below 20°C,  
364 typical of the western coast of south Africa (Kruger *et al.* 2010). The exposure to high wind  
365 speeds can result in elevated heat loss and hence favour higher thermogenic capacities despite  
366 higher  $T_{\text{min}} = 13$  °C.

367 Stressors such as exercise, cold exposure and starvation act to trigger mitochondrial biogenesis  
368 (O'Brien 2011) (Putti *et al.* 2015). Thus, we tested the role of density of mitochondria and lipid  
369 droplets (energy substrate) as a possible mechanism to respond to the extreme aerobic demand of  
370 shivering in the scrub-robin. Our prediction that mitochondrial density in pectoral muscle should  
371 increase with lower  $T_{\text{min}}$ , as a mean to power shivering, was not supported (Figure 3B). Yet, the  
372 lack of difference in mitochondrial density between *Coastal* and *Inland* birds is reconciled with  
373 the lack of flexibility in  $M_{\text{sum}}$  during winter for the same regions. The significant reduction of  
374 lipid droplets in limb in the *Inland* population ( $T_{\text{min}} = -0.4$  °C) together with increased number of  
375 transversal connections between mitochondria (increases energetic performance (Nasrallah and  
376 Horvath 2014)), suggest a depletion of energetic reserves. However, because it did not reflect an  
377 increase in thermogenic capacity, we suspect the lipid reserves may have been used to power  
378 walk in search for food, in the sparse arid environment.

379



### 380 *Thermosensation prior to thermogenesis*

381 Besides shivering, other mechanisms are proposed to contribute to cold conditions' tolerance:  
382 insulation capacity, locomotor activity and nonshivering thermogenesis. Modulation of insulation  
383 from the environment, measured here as flexibility in heat loss at maximum thermogenic capacity  
384 (a proxy for thermal conductance), could potentially alter bird's capacities to better control heat  
385 loss. However, our estimates, besides showing no clear regional differences in thermal  
386 conductance, also revealed no seasonal differences in thermal conductance in the population  
387 experiencing the coldest temperatures (*Inland*).

388 Increasing locomotor activity exploits the thermodynamic inefficiency of catabolic reactions in  
389 skeletal muscles (60% energy released as heat) and nonshivering thermogenesis uses a deflection  
390 of proton flux in mitochondria from ATP production to heat production (Hochachka and Somero  
391 2002). However, none of the mechanisms seem plausible in the scrub-robin. First, because being  
392 on the move for the sake of heat production in low productivity environments may lead to a  
393 mismatch between energetic demand and supply. And secondly, recent work suggests that  
394 nonshivering thermogenesis is not a prominent contributor to thermogenesis in adult passerines  
395 (Chevion and Swanson 2017). With neither locomotor activity nor nonshivering thermogenesis  
396 responsible for thermoregulation, we propose the explanation may be on how the scrub-robins  
397 sense the cold. This idea is supported by the fact we recorded a drastic reduction in  $T_b$  to 34 – 36  
398 °C, while birds maintained their maximum metabolic capacity, and remarkably that scrub-robins  
399 could fly at ease at  $T_b = 30 - 34$  °C, soon after the cold-experiment. It is thus possible that intra-  
400 specific variation exists in the somatosensory system (cutaneous thermoreceptors; e.g.: TPRM8  
401 channel (Matos-Cruz *et al.* 2017)) and hence some populations tolerated prolonged exposure to  
402 cold and hypothermia without engaging in active production of heat. An understanding of the  
403 sensory perception of cold in Karoo scrub-robin, as the first system to mediate organism-  
404 environment interactions (Gracheva and Bagriantsev 2015), is certainly warranted.

405 To conclude, we believe our study exemplifies that only when implementing a detailed  
406 framework at the intra-specific level one can contemplate to understand the factors underlying  
407 phenotypic flexibility and ultimately its role in adaptation.

408

409

#### 410 **Acknowledgments**

411 We are grateful to Hilda Vermuelen, Elsa van Schalkwyk and family, Eugene Marinus and  
412 Colleen Rust (SANBI Botanical Garden in Nieuwoudtville), and Marelé Nel for their support  
413 during field expeditions. We thank the South African Provincial Authorities for providing  
414 permits. This study was supported by a Marie Skłodowska-Curie Individual fellowship  
415 (European Union Horizon 2020 Research and Innovation Programme, grant 655150 - BARREN)  
416 and a British Ornithologists' Union small grant to AMR.

417

#### 418 **Author contributions**

419 AMR and BS conceived the study. AMR collected field data and conducted statistical analyses  
420 with critical input from CP, MTPG and BS. AMR and CP performed immunostaining and  
421 confocal microscopy imaging. NBP and BS collected physiological data. All authors wrote the  
422 manuscript and gave final approval for publication.

423

#### 424 **Data accessibility**

425 Data used in this study is provided in a spreadsheet as Supplementary Information.

426

#### 427 **LITERATURE CITED**

428 Angilletta M.J., B.S. Cooper, M.S. Schuler, and J.G. Boyles. 2010. The evolution of thermal  
429 physiology in endotherms. *Front Biosci (Elite Ed)* 2:861–881.

- 430 Bosma M. 2016. Lipid droplet dynamics in skeletal muscle. *Exp Cell Res* 340:180–186.
- 431 Bozinovic F. and D.E. Naya. 2014. Linking Physiology, Climate, and Species Distributional  
432 Ranges. Pp. 277–290 in L.B. Martin, C.K. Ghalambor, and H.A. Woods eds. *Integrative*  
433 *Organismal Biology*. Wiley-Blackwell.
- 434 Cheviron Z.A. and D.L. Swanson. 2017. Comparative Transcriptomics of Seasonal Phenotypic  
435 Flexibility in Two North American Songbirds. *Integrative and Comparative Biology*  
436 57:1040–1054.
- 437 Dahl R., S. Larsen, T.L. Dohmann, K. Qvortrup, J.W. Helge, F. Dela, and C. Prats. 2014. Three-  
438 dimensional reconstruction of the human skeletal muscle mitochondrial network as a tool to  
439 assess mitochondrial content and structural organization. *Acta Physiol* 213:145–155.
- 440 Dawson W.R. and J.M. Olson. 2003. Thermogenic capacity and enzymatic activities in the  
441 winter-acclimatized dark-eyed junco (*Junco hyemalis*). *Journal of Thermal Biology* 28:497–  
442 508.
- 443 Dawson W.R., C. Carey, and T.J. Vanthof. 1992. Metabolic Aspects of Shivering Thermogenesis  
444 in Passerines During Winter. *Ornis Scandinavica* 23:381–387.
- 445 Fick S.E. and R.J. Hijmans. 2017. WorldClim 2: new 1-km spatial resolution climate surfaces for  
446 global land areas. *Int J Climatol* 37:4302–4315.
- 447 Gracheva E.O. and S.N. Bagriantsev. 2015. Evolutionary adaptation to thermosensation. *Current*  
448 *Opinion in Neurobiology* 34:67–73.
- 449 Hijmans R.J. 2017. Package “raster” 1–244.
- 450 Hill G.E. 2011. Condition-dependent traits as signals of the functionality of vital cellular

- 451 processes. *Ecology Letters* 14:625–634.
- 452 Hochachka P.W. and G.N. Somero. 2002. Biochemical adaptation: mechanism and process in  
453 physiological evolution.
- 454 Holloway J.C. and F. Geiser. 2015. Effects of Helium/Oxygen and Temperature on Aerobic  
455 Metabolism in the Marsupial Sugar Glider, *Petaurus breviceps*. *Physiological and*  
456 *Biochemical Zoology* 74:219–225.
- 457 Hothola E. 2004. Shivering Thermogenesis in Birds and Mammals. Pp. 241–252 in B.M. Barnes  
458 and H.V. Carey eds. *Life in the cold: evolution, mechanisms, adaptation, and application*.  
459 12th International Hibernation Symposium.
- 460 Isaac P., M. Nunez-Villegas, F. Bozinovic, and P. Sabat. 2014. Metabolic enzymes in seasonally  
461 acclimatized and cold acclimated rufous-collared sparrow inhabiting a Chilean  
462 Mediterranean environment.
- 463 Janzen D.H. 1967. Why mountain passes are higher in the tropics. *The American Naturalist*  
464 101:233–249.
- 465 Jones T.R., I.H. Kang, D.B. Wheeler, R.A. Lindquist, A. Papallo, D.M. Sabatini, P. Golland, et  
466 al. 2008. CellProfiler Analyst: data exploration and analysis software for complex image-  
467 based screens. *BMC Bioinformatics* 9:482.
- 468 Kaiser A. 1993. A new multi-category classification of subcutaneous fat deposits of songbirds. *J*  
469 *Field Ornithology* 246–255.
- 470 Kruger A.C., A.M. Goliger, J.V. Retief, and S. SeKele. 2010. Strong wind climatic zones in  
471 South Africa. *Wind and Structures* 13.

- 472 Liknes E.T. and D.L. Swanson. 2011a. Phenotypic flexibility in passerine birds: Seasonal  
473 variation of aerobic enzyme activities in skeletal muscle. *Journal of Thermal Biology*  
474 36:430–436.
- 475 Liknes E.T. and D.L. Swanson. 2011b. Phenotypic flexibility of body composition associated  
476 with seasonal acclimatization in passerine birds. *Journal of Thermal Biology* 36:363–370.
- 477 Marsh R.L. and W.R. Dawson. 1989. Avian Adjustments to Cold. Pp. 205–253 in *Advances in*  
478 *Comparative and Environmental Physiology, Advances in Comparative and Environmental*  
479 *Physiology*. Springer Berlin Heidelberg, Berlin, Heidelberg.
- 480 Matos-Cruz V., E.R. Schneider, M. Mastrotto, D.K. Merriman, S.N. Bagriantsev, and E.O.  
481 Gracheva. 2017. Molecular Prerequisites for Diminished Cold Sensitivity in Ground  
482 Squirrels and Hamsters. *Cell Rep* 21:3329–3337.
- 483 McKechnie A.E. and D.L. Swanson. 2010. Sources and significance of variation in basal, summit  
484 and maximal metabolic rates in birds. *Curr Zool*.
- 485 Nasrallah C.M. and T.L. Horvath. 2014. nrendo.2014.160. *Nature Publishing Group* 10:650–658.
- 486 Noakes M.J., B.O. Wolf, and A.E. McKechnie. 2017. Seasonal Metabolic Acclimatization Varies  
487 in Direction and Magnitude among Populations of an Afrotropical Passerine Bird. *Physiol*  
488 *Biochem Zool* 90:178–189.
- 489 O'Brien K.M. 2011. Mitochondrial biogenesis in cold-bodied fishes. *J Exp Biol* 214:275–285.
- 490 Oswald K.N., A.A. Evlambiou, Â.M. Ribeiro, and B. Smit. 2018. Tag location and risk  
491 assessment for passive integrated transponder-tagging passerines. *Ibis* 160:453–457.
- 492 Peig J. and A.J. Green. 2009. New perspectives for estimating body condition from mass/length

- 493 data: the scaled mass index as an alternative method. *Oikos* 118:1883–1891.
- 494 Prince S.D. and S.N. Goward. 1995. Global primary production: A remote sensing approach.  
495 *Journal of Biogeography* 22:815–835.
- 496 Putti R., R. Sica, V. Migliaccio, and L. Lionetti. 2015. Diet impact on mitochondrial  
497 bioenergetics and dynamics. *Front Physiol* 6.
- 498 R Development Core Team. 2013. R: a language and environment for statistical computing. R  
499 Foundation for Statistical Computing, Vienna. <http://www.R-project.org/>.
- 500 Smit B. and A.E. McKechnie. 2010. Avian seasonal metabolic variation in a subtropical desert:  
501 basal metabolic rates are lower in winter than in summer. *Funct Ecology* 24:330–339.
- 502 Swanson D., Y. Zhang, and M. King. 2014a. Mechanistic Drivers of Flexibility in Summit  
503 Metabolic Rates of Small Birds. *PLoS ONE* 9:e101577.
- 504 Swanson D.L. and T. Garland Jr. 2009. The evolution of high summit metabolism and cold  
505 tolerance in birds and its impact on present-day distributions. *Evolution* 63:184–194.
- 506 Swanson D.L., M.O. King, and E. Harmon. 2014b. Seasonal variation in pectoralis muscle and  
507 heart myostatin and tolloid-like proteinases in small birds: a regulatory role for seasonal  
508 phenotypic flexibility? *J Comp Physiol B* 184:249–258.
- 509 Swanson D.L., M.W. Drymalsky, and J.R. Brown. 1996. Sliding vs static cold exposure and the  
510 measurement of summit metabolism in birds. *Journal of Thermal Biology* 221–226.
- 511 Tattersall G.J., Tattersall G.J., B.J. Sinclair, B.J. Sinclair, P.C. Withers, P.C. Withers, P.A. Fields,  
512 et al. 2012. *Coping with Thermal Challenges: Physiological Adaptations to Environmental*  
513 *Temperatures*. John Wiley & Sons, Inc., Hoboken, NJ, USA.

- 514 Thompson C.F. 2010. *Current Ornithology*. Springer Science & Business Media.
- 515 Vaillancourt E., S. Prud'homme, F. Haman, C.G. Guglielmo, and J.-M. Weber. 2005. Energetics  
516 of a long-distance migrant shorebird (*Philomachus pugnax*) during cold exposure and  
517 running. *J Exp Biol* 208:317–325.
- 518 van de Ven T.M.F.N., N. Mzilikazi, and A.E. McKechnie. 2013. Seasonal Metabolic Variation in  
519 Two Populations of an Afrotropical Euplectid Bird. *Physiological and Biochemical Zoology*  
520 86:19–26.
- 521 Vezina F., A. Dekinga, and T. Piersma. 2011. Shorebirds' Seasonal Adjustments in Thermogenic  
522 Capacity Are Reflected by Changes in Body Mass: How Preprogrammed and Instantaneous  
523 Acclimation Work Together. *Integrative and Comparative Biology* 51:394–408.
- 524 Vézina F., K.M. Jalvingh, A. Dekinga, and T. Piersma. 2006. Acclimation to different thermal  
525 conditions in a northerly wintering shorebird is driven by body mass-related changes in organ  
526 size. *J Exp Biol* 209:3141–3154.
- 527 Wickham H. 2016. *ggplot2 - elegant graphics for Data Analysis*. Springer International  
528 Publishing, Houston.
- 529 Zheng W.-H., J.-S. Liu, and D.L. Swanson. 2014. Seasonal phenotypic flexibility of body mass,  
530 organ masses, and tissue oxidative capacity and their relationship to resting metabolic rate in  
531 Chinese bulbuls. *Physiol Biochem Zool* 87:432–444.
- 532
- 533





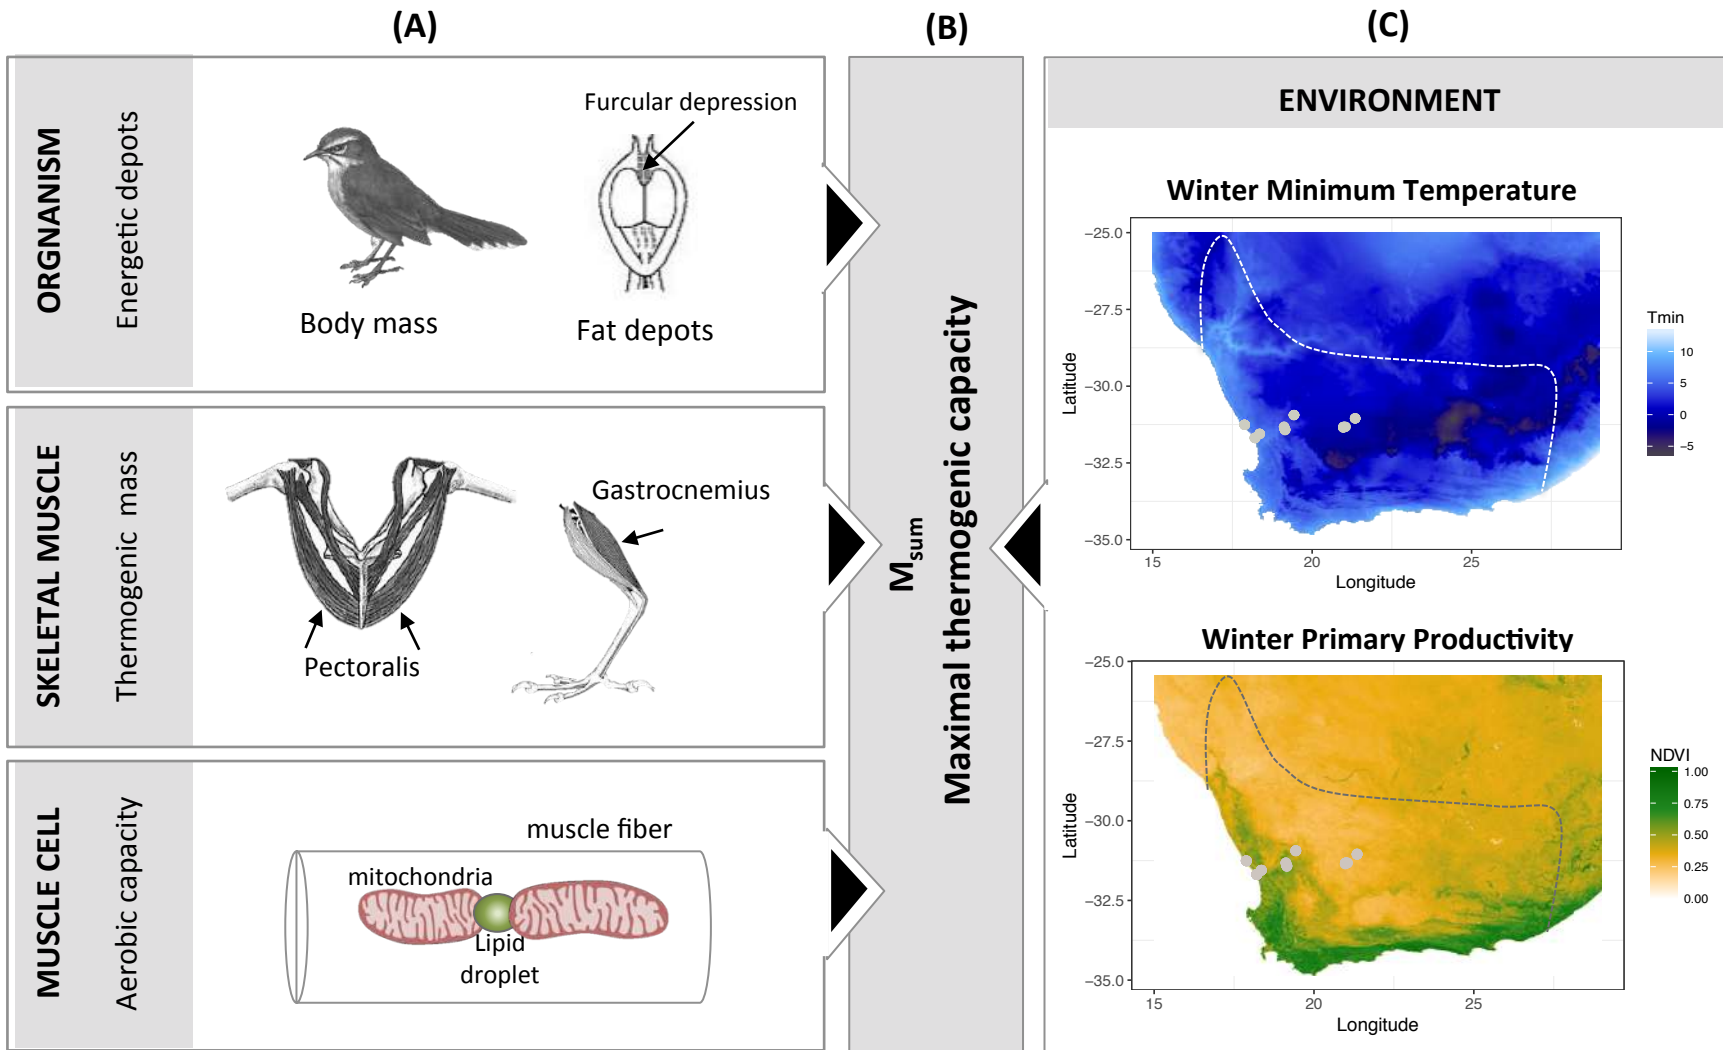

**Figure 1.** Framework to study the mechanisms of adaptive thermogenesis in small birds living in arid-zones. (A) The underlying mechanisms driving (B) flexibility in maximal thermogenic capacity, and the role of (C) environmental variables in shaping those mechanisms. Study sites relative to the species range (delimited by a dashed line) are depicted in the maps.

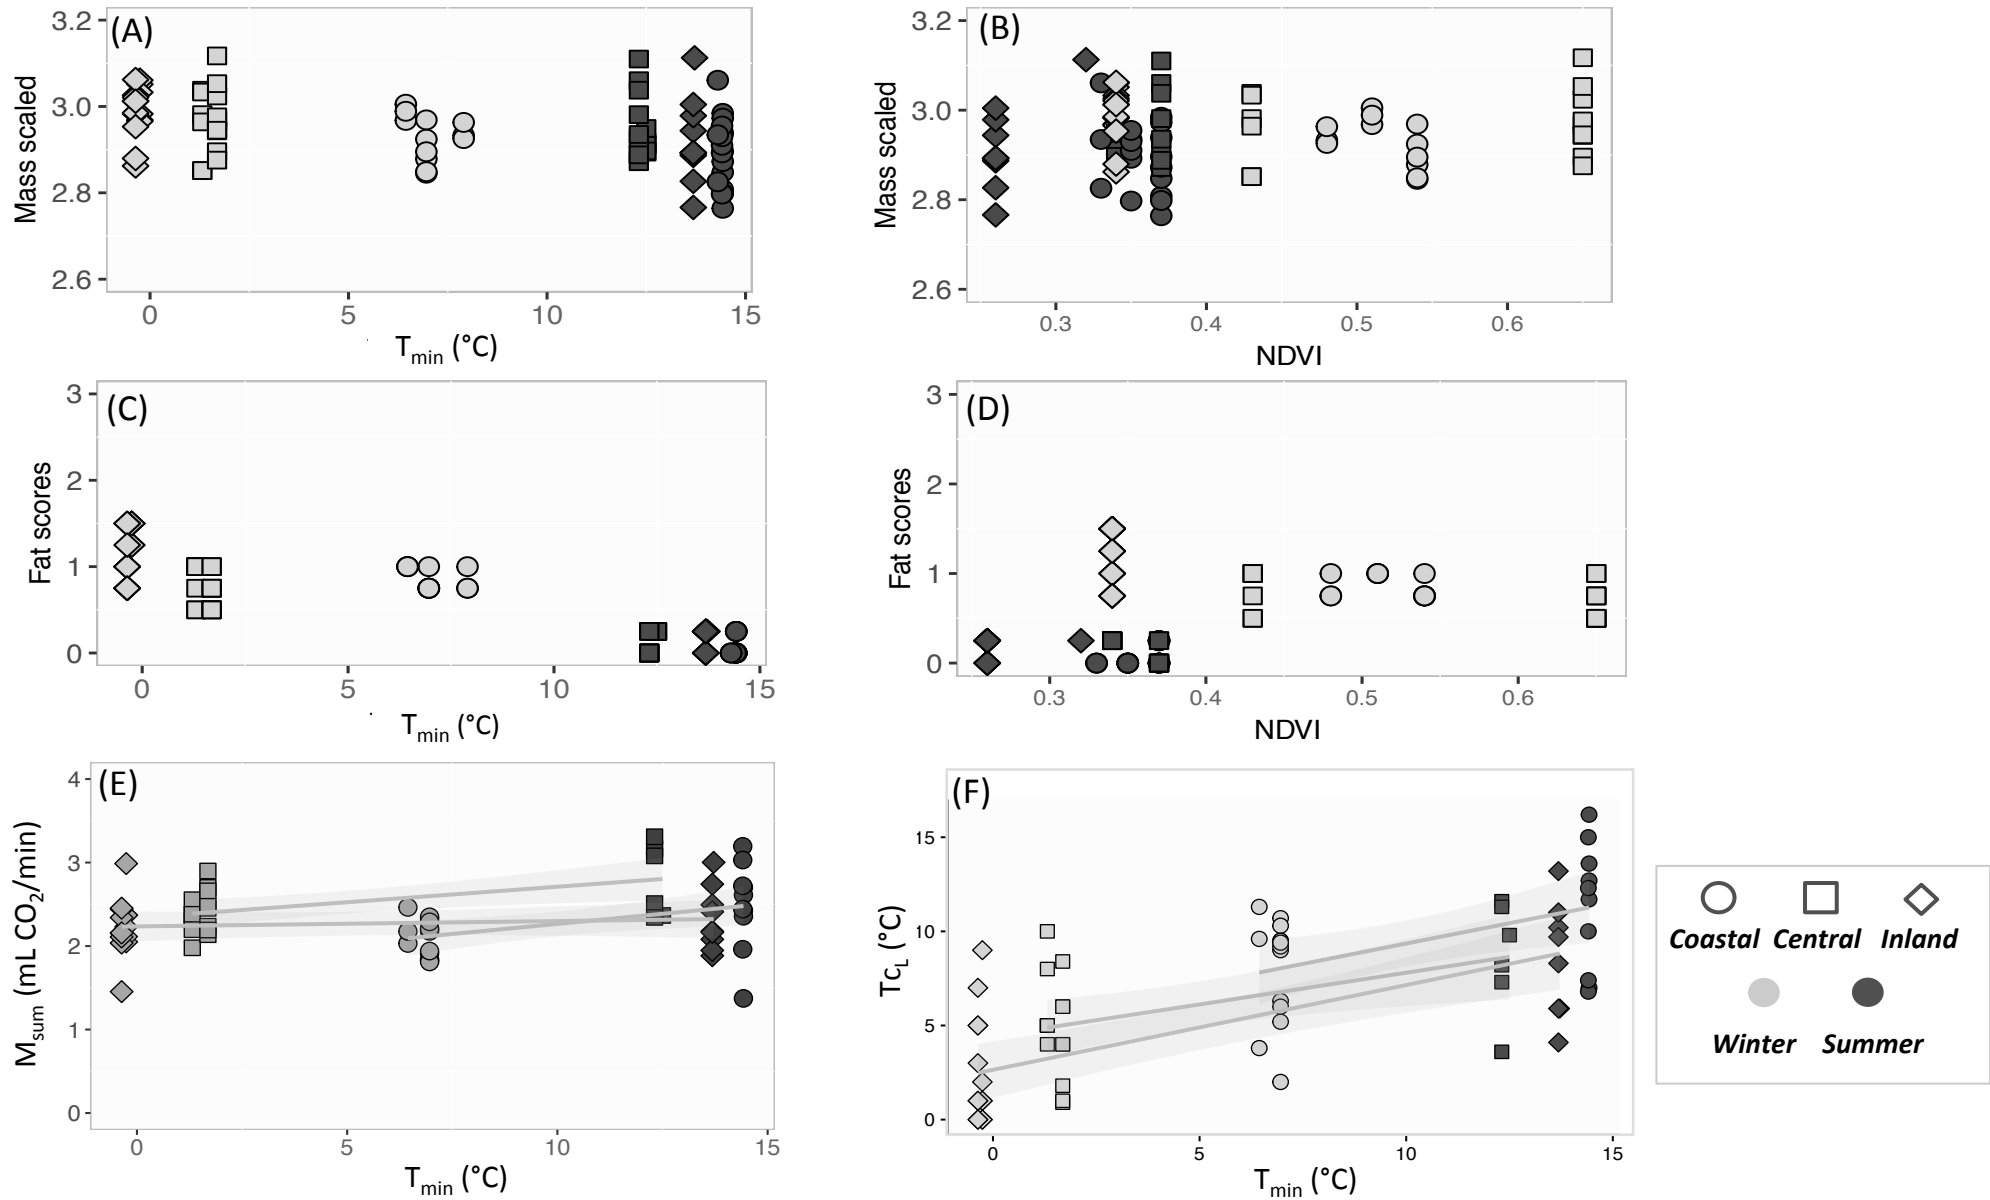

**Figure 2.** Variation in physiological traits in response to mean minimum temperature ( $T_{\min}$ ) and primary productivity (NDVI). (A-B) Mass scaled, (C-D) Fat scores, (E) maximum thermogenic metabolic capacity ( $M_{\text{sum}}$ ) and (F) cold limit ( $T_{cL}$ ).

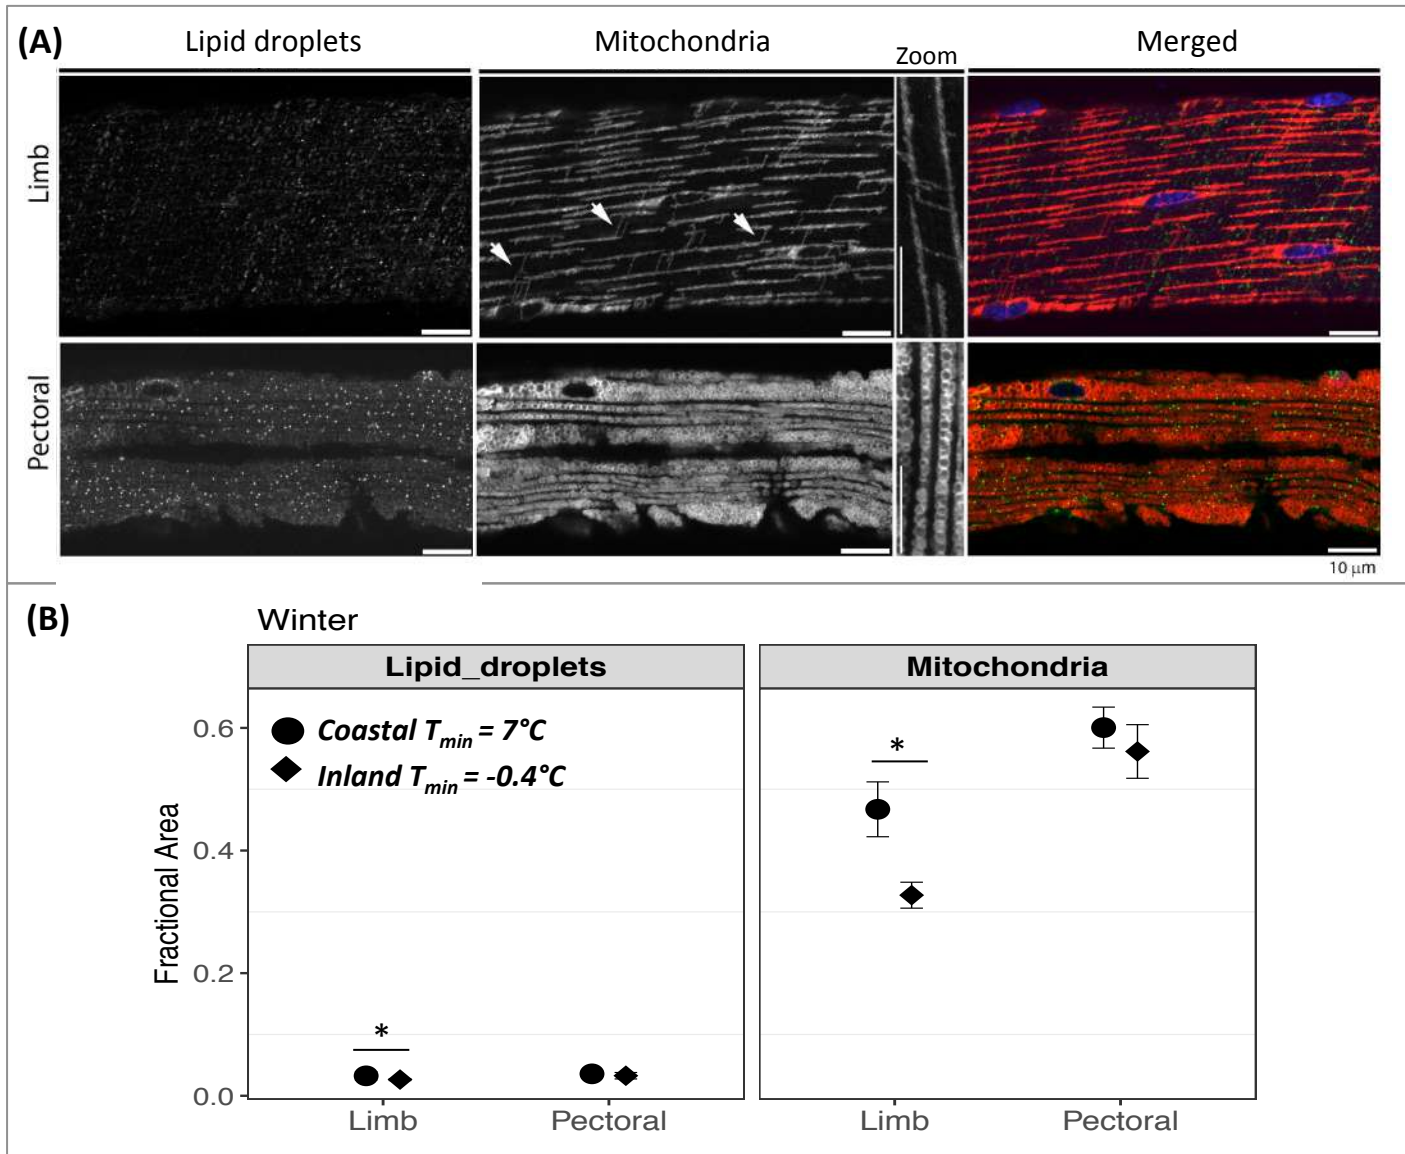

**Figure 3.** Variation in aerobic capacity in thermogenic muscles. (A) Confocal micrographs depicting mitochondria and lipid droplets (Perilipin2). Merged image show mitochondria (red), lipid droplets (green) and nuclei (blue). Transversal connections between mitochondria, exclusive of limb fibers, are indicated with arrows and visualized in zooming in images. Bars: 10  $\mu$ m. (B) Portion of muscle fiber occupied by lipid droplets and mitochondria in limb and pectoral, in winter, in *Coastal* and *Inland* populations. Significant differences ( $\alpha = 0.05$ ) are annotated with an asterisk.
